# Supplementary material for: Interplay between uncertainty intolerance, emotion regulation, cognitive flexibility, and psychopathology during the COVID-19 pandemic: a multi-wave study
Source: PubMed Central journal article supplement (PMC10276821; doi:10.1038/s41598-023-36211-3), 2023-06-17
Supplement: 41598_2023_36211_MOESM1_ESM.pdf [file 41598_2023_36211_MOESM1_ESM.pdf]

## Interplay between uncertainty intolerance, emotion regulation, cognitive flexibility, and psychopathology during the COVID-19 pandemic: A multi-wave study

Malvika Godara, Jonas Everaert, Alvaro Sanchez-Lopez, Jutta Joormann & Rudi De Raedt

**Supplementary Table S1.** Panel A provides descriptives of IU, ER difficulties, CCF, depression, anxiety and stress (mean and standard deviation) at each of the five timepoints. Panel B provides a correlation matrix indicating the associations between the slopes of IU, ER difficulties, CCF, depression, anxiety and stress.

| A | <b>Construct</b>       | <b>Timepoint 1</b><br>Mean ( <i>SD</i> ) | <b>Timepoint 2</b><br>Mean ( <i>SD</i> ) | <b>Timepoint 3</b><br>Mean ( <i>SD</i> ) | <b>Timepoint 4</b><br>Mean ( <i>SD</i> ) | <b>Timepoint 5</b><br>Mean ( <i>SD</i> ) |
|---|------------------------|------------------------------------------|------------------------------------------|------------------------------------------|------------------------------------------|------------------------------------------|
|   | <b>IU</b>              | 30.96 (10.34)                            | 31.21 (13.80)                            | 35.2 (14.48)                             | 32.67 (13.71)                            | 33.3 (12.92)                             |
|   | <b>ER difficulties</b> | 18.39 (10.95)                            | 18.62 (11.34)                            | 19.93 (10.77)                            | 19.13 (11.11)                            | 21.83 (10.08)                            |
|   | <b>CCF</b>             | 69.81 (29.83)                            | 72.29 (30.79)                            | 65.11 (34.42)                            | 66.38 (33.13)                            | 64.93 (34.34)                            |
|   | <b>Depression</b>      | 6.99 (5.82)                              | 7.42 (5.84)                              | 7.02 (5.69)                              | 7.49 (5.94)                              | 7.51 (6.03)                              |
|   | <b>Anxiety</b>         | 5.95 (5.46)                              | 5.93 (5.30)                              | 6.21 (5.59)                              | 6.34 (5.68)                              | 6.65 (5.80)                              |
|   | <b>Stress</b>          | 7.13 (5.63)                              | 7.20 (5.07)                              | 7.59 (5.60)                              | 7.25 (5.40)                              | 7.74 (5.62)                              |

| B | <b>IUS</b> | <b>ER difficulties</b> | <b>CCF</b> | <b>Depression</b> | <b>Anxiety</b> | <b>Stress</b> |
|---|------------|------------------------|------------|-------------------|----------------|---------------|
|   | 1.00       |                        |            |                   |                |               |
|   | .16*       | 1.00                   |            |                   |                |               |
|   | -.14*      | -.26**                 | 1.00       |                   |                |               |
|   | .18*       | .34***                 | -.12*      | 1.00              |                |               |
|   | .60***     | .15*                   | -.14*      | .18*              | 1.00           |               |
|   | .20**      | .35***                 | -.15*      | .19*              | .24**          | 1.00          |
